# Supplementary material for: Medical Needs and Therapeutic Options for Melanoma Patients Resistant to Anti-PD-1-Directed Immune Checkpoint Inhibition
Source: MDPI journal article supplement (doi:10.3390/cancers15133448), 2023-06-30
Supplement: s1 [file s1]

# Supplementary Materials: Medical Needs and Therapeutic Options for Melanoma Patients Resistant to Anti-PD-1 Directed Immune Checkpoint Inhibition

Jessica C. Hassel, Lisa Zimmer, Thomas Sickmann, Thomas K. Eigentler, Friedegund Meier, Peter Mohr, Tobias Pukrop, Alexander Roesch, Dirk Vordermark, Christina Wendl and Ralf Gutzmer

**Table S1.** Frequencies of response and resistance in selected neoadjuvant immunotherapy trials in melanoma (ICI monotherapy, or combined ICI).

| Trial                                                               | Treatment Regimens                                   | Trial Phase | Patients                                                        | N           | pCR, %   | Near pCR, % | pPR, %   | pNR, %   | MPR % | ORR % RECIST | CR, % RECIST | PR, % RECIST | SD, % RECIST | PD, % RECIST |
|---------------------------------------------------------------------|------------------------------------------------------|-------------|-----------------------------------------------------------------|-------------|----------|-------------|----------|----------|-------|--------------|--------------|--------------|--------------|--------------|
| NeoTrio [Long, ASCO 2022] ( <a href="#">NCT02858921</a> )           | (i) Pem 200 mg q3w x 2                               | II          | Stage III resect. lymph nodes, no in transit, BRAF V600 mutated | 60 (20/arm) |          |             |          |          |       |              |              |              |              |              |
|                                                                     | (ii) Dab (D) + Tram (T) q1w, Pem 200 mg day 8+22     |             |                                                                 |             | 6 (30%)  | 2 (10%)     | 3 (15%)  | 7 (35%)  | 40    | 30           | 2 (10%)      | 4 (20%)      | 5 (25%)      | 9 (45%)      |
|                                                                     | (iii) D (150mg bid) + T (2mg qd) + Pem 200mg q3w x 2 |             |                                                                 |             | 3 (15%)  | 3 (15%)     | 4 (20%)  | 10 (50%) | 30    | 45           | 0            | 9 (45%)      | 1 (5%)       | 10 (50%)     |
| DONIMI [Blank, ESMO 2021] ( <a href="#">NCT04133948</a> )           | (i) IFNg high: Nivo                                  | Ib          | Stage III resectable                                            | 40 (10/arm) | 7 (70%)  | 1 (10%)     | 1 (10%)  | 1 (10%)  | 80    | 50           | 1 (10%)      | 4 (40%)      | 5 (50%)      | 0            |
|                                                                     | (ii) IFNg high: Nivo + Domatinostat                  |             |                                                                 |             | 5 (50%)  | 1 (10%)     | 2 (20%)  | 2 (20%)  | 60    | 70           | 3 (30%)      | 4 (40%)      | 3 (30%)      | 0            |
|                                                                     | (iii) IFNg low: Nivo + Domatinostat                  |             |                                                                 |             | 1 (10%)  | 0           | 2 (20%)  | 7 (70%)  | 10    | 0            | 0            | 0            | 9 (90%)      | 0            |
| OpACIN [Blank, Nature Med 2018] ( <a href="#">NCT02437279</a> )     | (iv) IFNg low: Ipi + Nivo + Domatinostat             | Ib          | Stage III resectable                                            | 8           | 3 (30%)  | 1 (10%)     | 0        | 6 (60%)  | 40    | 40           | 1 (10%)      | 3 (30%)      | 1 (10%)      | 5 (50%)      |
|                                                                     | (i) Ipi 3mg/kg + Nivo 1mg/kg q3w x2                  |             |                                                                 |             | 2 (25%)  | 3 (37%)     | 1 (12%)  | 2 (25%)  | 62    | 50           | 0            | 4 (50%)      | 3 (37%)      | 1 (13%)      |
|                                                                     | Ipi 3mg/kg + Nivo 1mg/kg                             |             |                                                                 |             |          |             |          |          |       |              |              |              |              |              |
| OpACIN-NEO [Rozeman, ESMO 2018] ( <a href="#">NCT02977052</a> )     | Ipi 1mg/kg + Nivo 3mg/kg                             | II          | Stage III resectable                                            | (i) 30      | 14 (47%) | -           | 7 (23%)  | 6 (20%)  | 70    | 60           | 2 (7%)       | 16 (53%)     | 10 (33%)     | 2 (7%)       |
|                                                                     | Ipi 3mg/kg q3w x2, than Nivo 3mg/kg                  |             |                                                                 | (ii) 30     | 17 (57%) | -           | 2 (7%)   | 7 (23%)  | 64    | 60           | 3 (10%)      | 15 (50%)     | 9 (30%)      | 2 (7%)       |
|                                                                     | All three regimen: q3w x2                            |             |                                                                 | (iii) 26    | 6 (23%)  | -           | 15 (17%) | 8 (31%)  | 40    | 42           | 1 (4%)       | 10 (38%)     | 9 (35%)      | 6 (23%)      |
| PRADO [Rozeman, ASCO 2020] ( <a href="#">NCT02977052</a> )          | Ipi 1mg/kg + Nivo 3mg/kg q3w x2                      | II          | Stage III resectable                                            | 99          | 49 (50%) | 11 (11%)    | 10 (10%) | 21 (21%) | 61    | 45           | 14 (14%)     | 31 (31%)     | 38 (38%)     | 13 (13%)     |
| 2015-0041 [Amaria ASCO 2021] ( <a href="#">NCT02519322</a> )        | Rela 160mg+ Nivo 480mg q4w x2                        | II          | Stage III resectable                                            | 30          | 17 (59%) | 2 (7%)      | 2 (7%)   | 8 (27%)  | 66    | 57           | 0            | 17 (57%)     | 10 (33%)     | 3 (10%)      |
| 2015-0041 [Amaria, Nature Med 2018] ( <a href="#">NCT02519322</a> ) | (i) Nivo 3mg/kg q2w x4                               | II          | Stage III or IV resectable                                      | 12          | 3 (25%)  | -           | -        | -        | -     | 25           | 0            | 3 (25%)      | 5 (42%)      | 4 (33%)      |
|                                                                     | (ii) Nivo 1mg/kg + Ipi 3mg/kg q3w x4x                |             |                                                                 | 11          | 5 (45%)  | -           | -        | -        | -     | 73           | 1 (9%)       | 7 (64%)      | 2 (18%)      | 1 (9%)       |
| UPCC 01615 [Huang, Nature Med 2019] ( <a href="#">NCT02434354</a> ) | Pem 200mg flat, single-dose                          | IB          | Stage III or IV resectable                                      | 27          | 5 (18%)  | 3 (11%)     | 5 (18%)  | 14 (52%) | 29    | 50           | 0            | 3/6 (50%)    | 1/6 (17%)    | 2/6 (33%)    |
| SWOG1512 [Kendra, ASCO 2022] ( <a href="#">NCT02775851</a> )        | Pem 200mg q3w x3                                     | II          | Resectable desmoplastic melanoma                                | 29          | 16 (55%) | -           | -        | -        | -     | 46           | 4 (15%)      | 8 (31%)      | 12 (46%)     | 1 (4%)       |

Abbreviations: Dab, dabrafenib; ICI, immune checkpoint inhibitor; Ipi, ipilimumab; MPR, major pathological response; Nivo, nivolumab; Pem, pembrolizumab; Tram, trametinib; x1 (x2, ...), once (twice, ...).
